# Supplementary material for: TLR7 activation at epithelial barriers promotes emergency myelopoiesis and lung antiviral immunity
Source: eLife. 2023 Aug 11;12:e85647. doi: 10.7554/eLife.85647 (PMC10465127; doi:10.7554/eLife.85647)
Supplement: Figure 1—source data 1. [file elife-85647-fig1-data1.xlsx]

## Sheet: Figure 1
	Figure 1A						Figure 1B										Figure 1D
	Topical			Intraperitoneal			Treatment	Ly6C-high				Ly6C-low					Treatment	Acetone				R848
	Acetone	Topical R848		PBS	IP R848		0	140.135	120.12	97.6086	96.5796	73.5709	129.671	97.9756	109.078		0	1448.31	1122.24	802.432		924.892	1338.22	986.361	981.703
	460.889	19494.7		368.806	704.35		1	37.4062	22.788	58.5378	26.5194	17.2886	6.2149	20.142	9.14462		1	1399.87	1939.59	1905.85		1634.24	3775.7	1348.26	874.226
	386.368	29462.6		334.976	679.6		2	95.4755	295.674	495.203	352.379	110.137	728.114	1069.15	475.352		2	1031.31	2052.97	625.089		1625.94	1530.86	2017.29	2016.47
	544.73	26504.6		293.87	1168.55		3	201.434	232.437	187.745	144.95	2495.47	3032.93	2659.07	1573.49		3	946.029	1716.08	1500.73		1364.77	1590.49	1073.63	1317.82
							4	180.758	483.631	329.129	265.271	2043.93	7375.11	4693.75	2649.92		4	495.346	1798.34	857.002		713.943	1728.1	1297.3	587.436
	Figure 1E
		Monocytes per µl											Ly6C-high monocytes per µl										Ly6C-low monocytes per µl
	Treatments	IV R848				Topical R848						Treatments	IV R848				Topical R848					Treatments	IV R848				Topical R848
	0	615.214	1048.65	609.431	864.27	583.472	519.031	592.831	837.161			0	360.276	647.198	394.559	565.148	428.525	286.918	414.255	560.83		0	247.856	382.691	209.845	290.211	150.105	220.83	171.308	262.719
	1	262.291	439.511	141.488	73.92624777*	12.7811	144.659	9.64899	131.186			1	132.257	282.166	111.332	62.66595837*	10.5023	99.8481	5.70785	108.165		1	120.254	146.797	26.8684	9.98739	1.68433	42.1046	3.39753	18.8192
	4	598.828	760.717	536.712	916.797	778.391	2546.46	824.161	5634.7			4	409.123	462.314	290.748	538.686	400.85	537.526	288.456	623.249		4	179.801	290.838	244.186	369.974	372.961	1992.65	526.195	5036.91
	6	124.676	454.555	871.194		2117.86	2662.89	4083.39	4726.14			6	101.58	226.112	549.941		553.236	925.516	1038.01	1128.18		6	28.512	231.551	312.541		1789.37	1829.38	3311.32	4278.94
		Monocyte subpopulation ratio										Lymphocytes per µl
	Treatments	IV R848				Topical R848						Treatments	IV R848				Topical R848
	0	0.687961	0.591304	0.531847	0.513514	0.350282	0.769663	0.413534	0.468447			0	3602.76	7822.66	6169.7	4149.51	3617.04	9203.94	3924.52	5020.24
	6	0.280684	1.02405	0.568317		3.23438	1.97661	3.19008	3.79279			1	621.274	809.139	365.439	50.9161	65.4908	729.913	195.97	132.282
												4	3896.04	3244.03	1849.26	1776.84	2315.3	1773.23	1149.44	727.481
												6	281.032	1280.14	2499.24		719.639	1170.7	1551	1284.7
	Figure 1F
	Monocytes per µl
	Treatments	H20												R848
	0	708.77	1117	444.95	701.04	528.92	454.54	1144.8	403.88	464.23	363.14	587.88	411.4	349.71	529.7	315.1	302.59	746.62	275.11	321.37	580.66	491.31	452.5	253.16	458.19
	2	448.47	573.55	388.38	387.78	320.67	289.24	374.68	268.95	303.97	302.4	189.02	197.9	37.984	110.67	17.109	165.41	59.025	0	77.836	97.595	18.454	0.7725	13.051	43.179
	11	591.34	957.47	772.78	520.54	656.06	339.24		578.69	237.91	499.97	802.03	645.08	1662.5	8993.5	1925.6	2257.5	2930.8	2369	2907.9	6114.3			3643.8	7844.2
	Ly6C-high monocytes per µl
	Treatments	H20												R848
	0	233.201	550.45	179.73	297.986	148.836	167.029	517.273	155.147	159.937	136.86	202.481	138.264	142.446	176.568	84.9259	102.956	300.468	90.4582	107.762	266.753	188.146	121.321	88.202	156.866
	2	188.685	259.736	167.366	160.171	94.7642	110.029	149.239	119.387	140.012	141.765	80.4328	93.1691	7.92672	35.12	7.24012	29.0014	23.1577		45.9217	6.13034	6.07852	0.164792	10.0279	15.0503
	11	285.055	657.572	437.198	256.237	288.967	140.052		332.843		240.392	327.995	269.619	148.33	803.893	526.06	432.264	386.173	423.131	576.597	182.062			722.516	233.572
	Ly6C-low monocytes per µl
	Treatments	H20												R848
	0	475.568	566.511	265.224	403.05	380.084	287.509	627.534	248.738	304.29	226.285	385.399	273.134	207.263	353.135	230.173	199.634	446.15	184.654	213.609	313.903	303.166	331.175	164.955	301.329
	2	259.784	313.811	221.009	227.612	225.902	179.206	225.446	149.567	163.961	160.634	108.584	104.735	30.0577	75.5522	9.86922	136.405	35.8673		31.9138	91.4647	12.3754	0.607669	3.02312	28.1285
	11	306.282	299.902	335.583	264.307	367.096	199.185		245.85	237.908	259.578	474.037	375.462	1514.21	8189.58	1399.52	1825.26	2544.61	1945.92	2331.28	5932.26			2921.25	7610.63
	Monocyte subpopulation ratio
	Treatments	H20												R848
	0	2.0393	1.0292	1.4757	1.3526	2.5537	1.7213	1.2132	1.6032	1.9026	1.6534	1.9034	1.9755	1.0745	0.4561	0.7676	1.0315	1.2704	1.4222		0.7386		1.0798	1.4453	1.3926
	11	1.455	2	2.7103	1.939	1.4848	2.0413	1.9822	1.1768	1.6113	2.7297	1.8702	1.9209	10.208	10.187	2.6604	4.2226	6.5893	4.5989	4.0432	32.584			4.0432	32.584
	Lymphocytes per µl
	Treatments	H20												R848
	0	8330.07	7139.79	5595.93	5189.84	7995.3	5704.54	10508.8	3146.91	5241.01	4082.46	5849.45	4843.47	6059.62	4969.74	5119.36	3804.35	6658.1	4806.99	3673.5	3003.4	4669.37	4151.16	3074.35	4757.06
	2	7629.46	6675.13	5843.51	5886.99	3804.92	4488.33	6668.11	3404.08	3712.15	3744.91	1583.26	1687.75	141.244	100.461	273.021	831.948	166.762		657.765	67.1885	73.9613	9.52701	380.471	101.339
	11	7955.25	8972.47	6464.03	7919.13	8326.54	8548.35		5862.57	8205.17	9107.81	9624.38	9447.82	3077.85	2222.69	2014.91	3281.52	2413.58	2388.45	3766.54	1294.47			4719.74	1660.71

## Sheet: Figure 1- figure supplement 1
		Figure 1- figure supplement 1B						Figure 1- figure supplement 1C										Figure 1- figure supplement 1D
		Topical			Intraperitoneal			Leukocytes per ul										Monocytes per ul
		Acetone	Topical R848		PBS	IP R848		Treatments	Acetone			R848						Treatments	1ug R848								10ug R848				100ug R848				vehicle
		0.00528455	0.0732323		0.00570048	0.00896907		0	5851.42	4850.63		4176.28	4082.41	4691.04	5505.81	4313.51		0	838.489	403.439					890.787	1178.39	676.024	708.067	888.545	834.652	749.707	504.271	744.785	539.011	585.771	946.766	541.647	871.555
		0.00526316	0.0614286		0.00532995	0.00699074		1	5901.42	11071.5	8416.25	11367.9	2248.01	4149.87	1981.55	1109.85		1	1073.25	1682.41					1687.94	1477.43	1203.4	855.26	2513.62	1283.53	1267.66	1928.18	1739.55	1400.88	1304.79	1159.75	2233.94	1094.48
		0.00506329	0.0773333		0.00531	0.00841584		2	4860.48	8853.16	3402.19	9605.07	3178.74	3396.13	4743	3930.57		4	2038.28	2526.88					1667.2	1608.19	1842.43	1619.98	1812.52	1250.24	5111.21	968.605	982.585	1680.03	1404.02	1532.01	1320.28
								3	7594.82	8314.38	8658.28	11423	6250.23	6669.83	6008.74	4212.63		6	1027.08	1509.05					1823.64	2023.67	2412.33	1363.86	2569.03	2299.21	1365.25	1828.81	2716.68	1658.98	1811.18	1688.88	1462.53
								4	3089.51	9270.57	3763.33	7466.5	4602.55	13067.9	9706.05	4807.22
																		Ly6C high monocytes per ul
								B cells per ul										Treatments	1ug R848								10ug R848				100ug R848				vehicle
								Treatments	Acetone			R848						0	334.72	151.636					387.431	449.585	274.533	245.1	394.096	348.401	233.316	189.39	333.729	231.394	236.59	398.638	230.162	368.853
								0	1843.8	2122.63	2095.05		1416.24	2043.96	2420.02	1568.35		1	362.376	567.103					688.131	492.475	393.176	338.541	805.704	424.278	371.244	463.109	311.733	411.508	567.302	363.954	772.191	513.82
								1	1763.93	4317.16	3499.05	3683.61	79.5954	146.586	64.0323	59.1627		4	609.487	805.177					605.188	472.129	603.699	500.316	435.849	335.031	1960.34	372.573	476.903	881.325	551.262	577.679	368.901
								2	1642.51	3156.68	1317.21	3831.88	491.069	938.501	1031.78	958.635		6	80.849	373.094					550.763	653.476	363.965	282.041	819.49	634.138	443.425	469.305	136.235	314.333	642.336	499.591	510.92
								3	2864.37	1860.63	3375.6	4326.74	798.722	586.962	1025.86	201.906
								4	1065.39	3161.67	1263.6	2331.28	558.662	1054.91	1192.24	418.208		Ly6C low monocytes per ul
																		Treatments	1ug R848								10ug R848				100ug R848				vehicle
								CD4+ per ul										0	497.008	246.269					498.271	719.337	394.98	453.889	482.95	474.921	505.334	312.571	403.934	304.895	342.333	538.857	305.348	494.528
								Treatments	Acetone			R848						1	704.706	1096.4					985.646	969.28	801.799	520.471	1696.69	854.498	896.42	1456.47	1447.06	992.288	728.038	790.138	1444.65	573.696
								0	1429.88	1124.06	880.818		1098.31	1082.39	1017.44	1436.87		4	1418.81	1691.73					1038.58	1112.09	1209.49	1100.87	1365.72	907.036	3070.3	577.764	497.459	789.52	840.272	935.29	939.728
								1	1367.95	2286.18	1471.1	3374.81	200.113	297.664	152.467	50.6485		6	937.249	1119.28					1260.63	1346.77	2033.55	1079.17	1739.79	1663.22	915.058	1325.89	2572.43	1347.14	1137.25	1164.98	937.565
								2	1108.95	2313.53	770.234	3275.29	784.993	488.403	898.03	449.584
								3	1865.35	2260.58	2000.02	3207.56	983.55	621.942	848.304	551.482		B cells per ul
								4	589.022	1456.16	558.156	1767.02	313.71	582.726	676.273	231.221		Treatments	1ug R848								10ug R848				100ug R848				vehicle
																		0	4209.35	3104.66					5379.3	5856.44	5566.62	5605.53	5007.21	4758.65	5838.43	3926.39	5178.9	3396.04	3674.38	5933.22	3743.96	5108.76
								CD8+ per ul										1	7494.25	10817					9856.46	11617.9	5911.69	3769.9	9672.94	5193.54	3938.81	6989.67	2363.01	3502.19	12669.7	9617.43	14788.4	7101.58
								Treatments	Acetone			R848						4	9232.23	9208.14					9116.86	9073.73	9358.37	2595.56	2352.07	2647.56	110.101	497.047	974.362	486.565	8830.89	10749.5	6161.3
								0	442.135	441.257	273.701		339.609	424.903	316.155	497.74		6	17577.2	10671.7					10586.9	11430	10157.2	5760	5918.54	7787.66	3802.4	3738.31	685.982	4602.73	10108.9	10920.3	8392.44
								1	422.983	897.459	457.121	1169.05	26.7566	37.5653	17.1794	5.78528
								2	354.132	859.603	274.977	1134.58	254.854	172.857	331.188	170.196
								3	575.996	843.371	655.21	1048.8	313.548	204.282	280.795	231.531
								4	198.272	655.273	213.96	696.413	131.309	266.116	302.57	110.584
		Figure 1- figure supplement 1E																Figure 1- figure supplement 1F
		Monocytes per ul																Monocytes per ul
		Treatments	1ug R848			10ug R848				100ug R848								Treatments	R848					IMQ					Naïve
		0	890.513	1073.56	1522.42	1018.7	1005.58	1365.23	728.89	802.61	544.675	552.694	526.957					0	1369.87	1975.95	1160.37	1604.58	1134.61	1604.95	1757.38	1487.49	2476.2	2553.72	1573.77	1237.3	1594.4
		1	1046.48	3462.6	4894.34	3058.07	1318.23	2469.76	1913.47	58.1052	160.539	1.14558	29.4215					1	225.859	133.141	100.921	0	41.3306	1027.22	915.932	1267.15	936.918	925.568	1572.28	1726.82	2005.37
		4	745.8	5808.5	8026.06	8584.47	10076.6	13632.8	7334.89	20913.8	9232.24	16719.8	14780.4					3	2326.28	1325.14	594.627	4162.81	617.979	1199.15	803.79	2268.89	1145.84	1048.47	2538.1	1392.71	2002.17
																		5	7028.43		8069.39	7111.25	4895.15	1785.73	1246.25	1153.98	2201.2	1665.09	1110.15	1189.43	2438.25
																		6	9506.56	6306.43	7160	18284.4	8930.62	1586.62	802.949	2175.08	1427.55	2488.65	1962.05	1893.15	2053.16
		Ly6C high monocytes per ul																Ly6C high monocytes per ul
		Treatments	1ug R848			10ug R848				100ug R848								Treatments	R848					IMQ					Naïve
		0	420.848	574.192	751.134	559.11	627.319	660.264	442.87	432.657	263.765	364.778	315.562					0	713.389	989.152	557.873	711.65	494.573	608.637	704.611	600.504	1057.66	1090.8	660.985	460.154	545.534
		1	425.369	1431.15	1822.58	1081.29	487.867	1139.09	747.504	43.5789	160.539	0	19.6144					1	33.0863	31.8059	22.0106	0	8.50924	347.602	332.118	380.144	262.705	270.115	547.274	829.183	866.985
		4	408.386	3430.64	5203.89	5618.92	6861.79	9907.23	4762.21	13574.4	6829.79	12589	12339.3					3	1205.25	492.351	298.754	1537.61	185.711	290.882	247.906	548.138	331.598	286.094	1561.91	433.006	1095.53
																		5	1849		1613.88	2096.59	1211.67	562.755	423.724	399.128	580.316	624.41	357.643	833.571	1409.61
																		6	734.185	944.209	1062.69	1187.49	1030.57	465.496	291.069	539.857	457.299	642.274	691.642	950.288	784.239
		Ly6C low monocytes per ul																Ly6C low monocytes per ul
		Treatments	1ug R848			10ug R848				100ug R848								Treatments	R848					IMQ					Naïve
		0	462.932	491.235	751.134	446.926	370.773	691.214	280.484	366.191	275.635	183.178	208.332					0	587.377	862.277	554.525	828.013	581.851	891.864	958.271	816.74	1299.53	1353.47	871.299	732.411	989.464
		1	612.33	1992.3	3023.98	1939.63	815.575	1281.04	1135.56	9.87789	0	1.14558	9.80718					1	171.177	93.3837	73.0565	0	26.3013	644.761	551.793	854.451	634.716	615.786	893.478	728.063	1032.84
		4	329.596	2332.47	2732.45	2861.49	3052.69	3600.74	2496.05	7054.39	2230.84	3860.3	2221.08					3	922.49	759.55	278.581	2332.67	404.38	874.131	518.656	1653.96	766.494	711.171	818.606	862.214	819.757
																		5	4834.14		6102.48	4818.49	3460.53	1188.04	803.533	734.734	1582.68	999.056	724.996	291.073	989.015
																		6	8673.98	5253.41	5923.96	16793.8	7767.07	1052.28	454.795	1580.45	897.661	1734.52	1145.53	838.926	1204.97
																		Ly6C low : Ly6C high ratio
		B cells per ul																Treatments	R848					IMQ
		Treatments	1ug R848			10ug R848				100ug R848								0	0.823362	0.871734	0.994	1.16351	1.17647	1.46535	1.36	1.36009	1.22868	1.2408
		0	7289.08	7417.33	7969.35	7780.49	9231.88	7806.25	8451.43	5680.97	5776.46	7011.31	6204					6	11.8144	5.56382	5.57447	14.1423	7.53666	2.26056	1.5625	2.92754	1.96296	2.70059
		1	5357.89	17748	29147.6	10998.6	3757.56	1811.93	3755.4	261.474	91.8747	27.3775	103.115
		4	2742.62	19376.8	33931.3	4578.38	4889.7	759.693	6760.14	342.031	147.578	277.843	557.952
