# Supplementary material for: TLR7 activation at epithelial barriers promotes emergency myelopoiesis and lung antiviral immunity
Source: eLife. 2023 Aug 11;12:e85647. doi: 10.7554/eLife.85647 (PMC10465127; doi:10.7554/eLife.85647)
Supplement: Figure 2—source data 1. [file elife-85647-fig2-data1.xlsx]

## Sheet: Figure 2
		Figure 2A															Figure 2B
		Monocytes per µl															Monocytes per µl
		Treatments	R848				LPS				Poly I:C						Treatments	CpG			R848
		0	530.634	479.331	730.25	406.56	83.6437	332.831	433.438	92.6591	573.542	451.555	319.404	417.344			0	541.59	509.276	478.292	1205.5	808.39	1352.85	860.827
		1	44.1687	72.2466	62.0953	27.7292	359.494	113.314	215.74	71.1473	507.7	250.242	636.124	128.454			1	505.948	547.583	294.68	57.6389	40.6826	187.741	147.747
		4	683.795	496.475	906.072	844.555	653.54	181.204	196.957	84.0595	115.897	208.431	431.668	416.714			4	651.828	800.109	537.882	5797.05	5069.94	1682.89	6838.09
		8	422.561	2245.84	2649.3	2567.86	74.9775	447.405	52.7608	205.498	429.378	408.286	390.818	231.329			6	1192.68	1213.9	626.265	9201.16	4681.81	8876.62	3016.28
		Ly6C-high monocytes per µl															Ly6C-high monocytes per µl
		Treatments	R848				LPS				Poly I:C						Treatments	CpG			R848
		0	282.53	256.543	349.465	277.271	47.4926	195.922	260.305	73.2849	456.367	260.385	191.642	314.839			0	283.104	234.071	217.81	524.788	234.694	397.815	327.236
		1	29.7172	19.6892	40.582	16.8925	271.216	44.5162	136.01	45.4683	319.869	162.759	432.637	88.9294			1	226.368	260.252	157.002	34.0962	25.8327	74.0468	41.8351
		4	275.246	193.615	286.204	320.853	540.095	127.258	161.245	59.2237	91.4976	143.223	301.982	273.469			4	268.481	479.837	284.269	586.877	1372.59	603.326	1015.57
		8	142.318	864.47	485.505	569.802	63.774	383.724	44.497	174.629	345.535	310.835	270.566	177.612			6	741.983	575.383	340.205	1002.11	1573.4	1866.29	1073.93
		Ly6C-low monocytes per µl															Ly6C-low monocytes per µl
		Treatments	R848				LPS				Poly I:C						Treatments	CpG			R848
		0	244.543	221.662	370.895	127.732	34.0246	135.729	165.869	17.2683	117.175	186.225	124.004	100.414			0	258.486	273.246	259.593	680.715	572.61	953.667	531.148
		1	10.1771	45.7297	19.0686	7.96816	76.5785	50.9913	75.8217	23.7943	169.233	83.4141	197.987	35.8188			1	277.047	282.818	136.471	21.5131	13.6124	113.694	105.206
		4	403.612	300.697	609.801	513.95	110.978	52.5631	35.7119	21.9701	19.3162	64.0429	125.98	141.618			4	381.963	319.132	252.916	5199.42	3672.62	1068.39	5794.99
		8	278.486	1383.15	2145.81	1968.07	10.3417	58.7832	8.26373	29.9868	82.5727	99.1312	117.389	53.7169			6	444.9	633.101	282.451	8153.51	3082.83	6978.97	1922.46
		Monocyte subpopulation ratio															Monocyte subpopulation ratio
		Treatments	R848				LPS				Poly I:C						Treatments	CpG			R848
		0	0.865546	0.864035	1.06132	0.460674	0.716418	0.692771	0.637209	0.235632	0.256757	0.71519	0.647059	0.318937			0	0.913043	1.16736	1.19184	1.29712	2.43981	2.39726	1.62313
		8	1.95679	1.6	4.41975	3.45395	0.162162	0.153191	0.185714	0.171717	0.238971	0.318919	0.433862	0.302439			6	0.599609	1.10031	0.830239	8.13636	1.95935	3.7395	1.79012
		Lymphocytes per µl															Lymphocytes per µl
		Treatments	R848				LPS				Poly I:C						Treatments	CpG			R848
		0	5603.11	6087.28	9148.73	3839.73	1807.55	6314.35	6501.57	2329.11	9990.73	10036.4	5749.27	5491.37			0	7908.44	7678.32	6632.08	12155.6	8561.98	9713.78	8962.37
		1	207.41	180.855	753.7	565.102	6179.46	1975.71	4439.87	866.254	11251.2	7069.86	11750.9	3841.25			1	6537.63	5611.22	4522.86	390.889	266.37	1061.14	658.417
		4	4900.12	4380.66	2229.22	3491.35	15783.6	9613.52	6558.01	5263.27	5652.52	7312.54	12412.8	11329.4			4	10573.2	8605.16	5044.39	2765.85	3185.41	3128.36	4185.43
		8	1049.81	6684.05	3952.37	6185.35	3205.94	8556.22	3604.26	3836.55	6440.67	9610.69	8446.25	4695.9			6	9086.39	13365.5	6127.29	2525.01	3859.3	3040.95	1463.72
		Figure 2C															Figure 2D
		Monocytes per µl			Ly6C-high per µl			Ly6C-low per µl			Monocyte subpopulation ratio			Lymphocytes per µl			Monocytes per µl
		Naive	TPA		Naive	TPA		Naive	TPA		Naive	TPA		Naive	TPA		Treatments	WT					TLR7-/-
		289.653	278.034		193.102	163.21		87.3557	99.659		0.610619	0.452381		3683.05	4197.02		0	440.369	1708.51	712.276	462.616	893.45	1969.35	2099.54	1398.41	783.797	1091.86
		364.067	233.152		230.077	129.447		124.294	97.8209		0.755682	0.54023		3861.35	5386.08		4	4336.21	2438.46	1631.95	3771.41	2548.73	2066.73	1227.48	486.865	1856.96	802.851
		358.614	488.517		215.168	316.359		131.373	163.329		0.516279	0.610561		4252.45	4154.24
		566.221	259.3		432.254	140.902		116.175	103.72		0.736111	0.268765		5949.21	5683.15		Ly6C-high monocytes per µl
																	Treatments	WT					TLR7-/-
																	0	170.448	764.17	478.663	283.648	483.314	1230.35	1347.91	700.39	308.401	520.121
																	4	553.437	475.003	150.207	630.354	639.667	899.265	434.733	175.489	869.756	203.708
																	Ly6C-low monocytes per µl
																	Treatments	WT					TLR7-/-
																	0	258.186	893.085	217.277	168.838	393.118	703.895	719.646	664.777	456.541	541.296
																	4	3727.62	1903.32	1439.96	3082.92	1838.78	1143.8	768.773	299.022	949.114	570.568
																	Monocyte subpopulation ratio
																	Treatments	WT					TLR7-/-
																	0	1.51475	1.1687	0.453925	0.595238	0.81338	0.572108	0.533898	0.949153	1.48035	1.04071
																	4	6.7354	4.00697	9.58647	4.89078	2.87458	1.27193	1.76838	1.70393	1.09124	2.8009
																	Lymphocytes per µl
																	Treatments	WT					TLR7-/-
																	0	3593.37	9800.64	12285.1	8802.08	13155	11153.1	13501.9	14102.8	8228.52	8959.84
																	4	2529.45	1119.93	2095	1476.44	2662.32	8992.65	11044.1	2049.19	8443.62	5124.97

## Sheet: Figure 2-figure supplement 1
			Figure 2- figure supplement 1A															Figure 2- figure supplement 1B
			Monocytes per ul															Monocytes per ul
			Treatments	WT						Ifng-/-								Treatments	WT				Ifnar1-/-
			0	744.682	1087.05	438.605			316.778	566.235	838.295							0	497.592	417.788	354.293	388.543	963.422	632.33	805.647	662.572	391.85
			2	195.165	204.768	190.554				72.4756	74.4872	50.0512						2	957.898	270.602	987.18	1592.4	2637.1	625.095	1887	2636.27	1561.86
			4	1900.82	5088.58	2579.72				2056.49	2356.73	2343.19						4	2486.46	1026.67	4194.89	4513.21	1557.53	2494.57	2340.37	1963.56	3085.88
																		8	4809.4	873.371	3717.85	2083.03	6248.46	2871.95	2247.95	4135.39	5529.15
			Ly6C high monocytes per ul															Ly6C high monocytes per ul
			Treatments	WT						Ifng-/-								Treatments	WT				Ifnar1-/-
			0	383.456	534.591	226.207			123.996	311.06	546.84							0	221.707	222.767	196.889	201.181	694.078	337.491	598.3	288.671	200.42
			2	83.6422	107.63	120.903				34.7669	34.667	24.123						2	221.801	17.0602	421.759	495.668	521.526	76.5906	292.427	359.684	395.3
			4	309.067	688.766	523.468				537.957	500.432	653.154						4	331.632	221.919	1635.16	930.588	214.394	218.329	128.566	82.7055	408.206
																		8	1130.83	44.6961	80.0872	321.142	284.28	503.819	405.457	248.743	586.014
			Ly6C low monocytes per ul															Ly6C low monocytes per ul
			Treatments	WT						Ifng-/-								Treatments	WT				Ifnar1-/-
			0	352.89	567.573	213.055			200.023	260.447	294.341							0	272.203	192.62	155.537	185.501	257.656	285.775	193.893	367.568	186.142
			2	108.295	94.2608	67.8986				36.9064	38.2586	24.9435						2	679.332	247.242	516.655	1038.86	2088.74	541.925	1574.91	2241.15	1129.47
			4	1598.75	4400.7	2063.78				1535.56	1869.13	1710.45						4	2143.39	790.796	2528.12	3533.81	1314.75	2215.47	2134.05	1833.26	2637.9
																		8	3609.5	827.134	3631.31	1737.37	5944.98	2329.94	1808.68	3868.53	4909.04
			Ly6C low : Ly6C high ratio															Ly6C low : Ly6C high ratio
			Treatments	WT						Ifng-/-								Treatments	WT				Ifnar1-/-
			0	0.92029	1.0617	0.94186			1.61314	0.83729	0.53826							0	1.22776	0.864671	0.789973	0.922061	0.371221	0.846761	0.324074	1.27331	0.92876
			4	5.17282	6.38924	3.94251				2.85443	3.73504	2.61875						8	9.51579	7.73684	19.8529	7.30833	15.2597	13.5965	7.65517	12.4161	10.8639
			Figure 2- figure supplement 1C
			Monocytes per ul
			Treatments	PBS						Etanercept
			0	435	487	304	540	472	368	883	393	469	457	442	357
			2	725	917	1693	2155	654	1199	622	1059	1700	1169	1573	1009
			4	3286	2602	3052	3237	3402	4203	4268	4828	2457	3885	2663	3321
			Ly6C high monocytes per ul
			Treatments	PBS						Etanercept
			0	230	308	178	344	305	255	452	188	318	281	227	179
			2	297	504	810	747	342	527	374	677	908	429	821	502
			4	424	166	227	190	210	279	262	238	93	280	162	264
			Ly6C low monocytes per ul
			Treatments	PBS						Etanercept
			0	202	175	125	195	165	110	426	202	149	175	212	176
			2	425	406	872	1388	306	667	243	375	785	730	741	502
			4	2854	2430	2823	3037	3182	3915	4005	4584	2359	3585	2486	3052
			Ly6C low : Ly6C high ratio
			Treatments	PBS						Etanercept
			0	0.878261	0.568182	0.702247	0.56686	0.540984	0.431373	0.942478	1.07447	0.468553	0.622776	0.933921	0.98324
			4	6.73113	14.6386	12.4361	15.9842	15.1524	14.0323	15.2863	19.2605	25.3656	12.8036	15.3457	11.5606
			Figure 2- figure supplement 2D
			Monocytes per ul
			R848- Anakinra +	R848+ Anakinra -	R848+ Anakinra +
			374.413	1311.45	1399.09
			393.734	2825.74	3474.66
			539.917	2114.57	2679.62
			366.85	2268.07	2564.92
			Ly6C high monocytes per ul
			R848- Anakinra +	R848+ Anakinra -	R848+ Anakinra +
			201.934	133.407	187.799
			173.621	289.766	318.069
			244.047	207.133	192.512
			196.423	184.069	250.738
			Ly6C low monocytes per ul
			R848- Anakinra +	R848+ Anakinra -	R848+ Anakinra +
			171.418	1177.25	1210.23
			219.588	2533.06	3152.92
			294.548	1906.91	2483.84
			168.588	2083.48	2307.85
			Ly6C low : Ly6C high ratio
			R848- Anakinra +	R848+ Anakinra -	R848+ Anakinra +
			6.44429	8.82446	0.848883
			9.91268	8.74176	1.26475
			12.9023	9.20619	1.20693
			9.20421	11.319
			Figure 2- figure supplement 2E
			Monocytes per ul
			Isotype	PBS	aIL6R
			3648	471	3104
			6077	3169	5213
			4113	4038	1810
			5520	3252	195
			4375	2634	2428
			4254	2761	3845
			Ly6C high monocytes per ul
			Isotype	PBS	aIL6R
			616	33	392
			596	345	675
			423	368	143
			502	265	29
			383	276	226
			484	145	307
			Ly6C low monocytes per ul
			Isotype	PBS	aIL6R
			3005	437	2702
			5452	2811	4514
			3616	3663	1656
			4997	2973	164
			3969	2350	2180
			3717	2613	3528
			Ly6C low : Ly6C high ratio
			Isotype	PBS	aIL6R
			4.9	13.3	6.9
			9.2	8.2	6.7
			8.5	10	11.5
			10	11.2	5.6
			10.4	8.5	9.6
			7.7	18	11.5
