# Supplementary material for: TLR7 activation at epithelial barriers promotes emergency myelopoiesis and lung antiviral immunity
Source: eLife. 2023 Aug 11;12:e85647. doi: 10.7554/eLife.85647 (PMC10465127; doi:10.7554/eLife.85647)
Supplement: Figure 3—source data 1. [file elife-85647-fig3-data1.xlsx]

## Sheet: Figure 3
		Figure 3A														Figures 3B
		Monocytes per µl														Monocytes per µl
		Treatments	C57Bl/6						Rag2-/-							Treatments	TLR7-Fl x LysM-Cre						C57Bl/6
		0	519.948	159.567	346.177	450.475	382.029		455.869	334.181	422.218	673.443	494.472	551.616		0	2095.27	1309.78	3250.16	1604.61	2352.48		2357.41	2412.29	1794.08	2974.54	2947.43
		4	1678.04	2472.06	8534.28		18078.3		5013.91	6390.68	6903.3	3817.52	4189.07	3008.78		1	0	7.19934	0	2.91098	0		4.51277	0	0	6.51984	5.70905	2.85608
																2	4902.55	2973.4	2580.84	2628.27			6426.03	5476.67	6873.08	2550.78	6749.25	6253.12
		Ly6C-high monocytes per µl														4	6584.08	13559.6	6560.17	11837.9	7228.59		17488.5	21133.5	20375.4	15749.8	14376.4	15577.5
		Treatments	C57Bl/6						Rag2-/-							6	14562	7475.11	7896.52	6490.75	10284.5		9957.82	17269.6	19594.3	14891.3	18010.6	12712.4
		0	275.495	95.5368	172.494	252.304	203.187		330.645	224.841	296.777	474.972	347.417	388.107
		4	554.39	494.412	1178.78		586.117		838.314	879.997	798.783	566.793	617.216	421.23		Ly6C-high monocytes per µl
																Treatments	TLR7-Fl x LysM-Cre						C57Bl/6
		Ly6C-low monocytes per µl														0	1073.1	754.62	1975.01	978.755	1083.69		1066.88	881.173	808.807	1359.7	1358.27
		Treatments	C57Bl/6						Rag2-/-							1	0	7.19934	0	0	0		4.51277	0	0	0	2.76802	2.85608
		0	244.453	63.0137	173.684	197.203	178.842		122.55	109.956	124.371	196.774	146.871	158.118		2	2674.12	1425.04	1217.38	1115.84			3050.04	2270.48	3338.36	1093.19	3634.21	2646.37
		4	1093.91	1970.84	7282.92		17469.3		4167.62	5460.45	6073.39	3234.05	3560.42	2564.41		4	3127.7	5017.04	2705.47	5159.62	3460.36		5345.15	4398.83	5093.86	4825.25	3922.74	3538.32
																6	3214.98	1555.3	1540.15	454.086	1728.2		776.146	1900.76	2932.62	1441.23	1540.51	1317.02
		Monocyte subpopulation ratio
		Treatments	C57Bl/6						Rag2-/-							Ly6C-low monocytes per µl
		0	0.887324	0.659574	1.0069	0.781609	0.880184		0.370638	0.489041	0.419072	0.414286	0.422751	0.407407		Treatments	TLR7-Fl x LysM-Cre						C57Bl/6
		4	1.97318	3.98624	6.17834		29.8052		4.97143	6.20507	7.60331	5.70588	5.76852	6.08791		0	1003.98	551.837	1271.48	625.852	1265.42		1284.49	1531.12	981.073	1599.28	1591.61
																1	0	0	0	0	0		0	0	0	0	2.76802	0
																2	2208.37	1548.36	1351.29	1513.6			3352.71	3219.95	3506.68	1457.59	3091.44	3606.75
			Figure 3C													4	3435.17	8474.73	3818.78	6600.42	3731.28		12065.5	16670.9	15195.7	10870.4	10391.1	11994.7
			Monocytes as % of live					Neutrophils as % of live								6	11347	5919.8	6346.59	6036.67	8570.44		9186.13	15366.1	16655.2	13454.4	16442.2	11374.2
			Treatment 1		Treatment 2			Treatment 1		Treatment 2
			acetone	R848	acetone	R848		acetone	R848	acetone	R848					Monocyte subpopulation ratio
			0.17	0.38	0.14	1.37		0.036	0.35	0.053	0.27					Treatments	TLR7-Fl x LysM-Cre						C57Bl/6
			0.068	0.44	0.12	2.02		0.055	0.57	0.057	0.3					0	0.935593	0.731278	0.643785	0.639437	1.1677		1.20397	1.73759	1.21299	1.1762	1.17179
			0.19	0.3	0.2	1.16		0.033	0.29	0.1	0.23					6	3.52941	3.8062	4.12076	13.2941	4.95916		11.8356	8.08418	5.67929	9.33535	10.6732	8.63636

## Sheet: Figure 3-figure supplement 1
		Figure 3-figure supplement 1A
		Monocytes per ul
		Treatments	WT BM --> WT					TLR7 BM --> WT					TLR7 BM --> TLR7							TLR7 BM --> TLR7
		0	9.06	7.94	5.99		7.37	8.64	7.41	6.57	5.15	10.6	5.25	7.14	9.28	8.13	7.96	7.36	8.06	6.45	7.71	7.82
		2	19.1	22	20.7		14	17.3	7.42	19.1	11.1	22.5	6.67	8.47	9.66	8.02	7.45	14	16.4	19.9	15.5	12.7
		4	63.9	58.3	58.6		63	28.5	28.2	19.3	24.7	30.9	13.6	23.5	17.8	22		54.3	46	50.2	49.6	66.5
		Ly6C high monocytes per ul
		Treatments	WT BM --> WT					TLR7 BM --> WT					TLR7 BM --> TLR7							TLR7 BM --> TLR7
		0	3.99	3.73	2.64		3.29	5.64	4.34	3.47	2.84	7.84	1.98	3.37	3.96	3.43	2.97	3.8	4.31	3.41	3.45	4.01
		2	10.1	11.3	10.5		6.2	11.9	4.4	13	8.32	15.4	4.08	5.85	5.66	4.69	5	7.28	7.42	12.5	6.29	6.8
		4	16.5	21.1	27.5		27.3	13.7	16.6	9.15	15.6	17.9	6.63	11.6	9.26	10		20.4	18.4	20.3	17.5	9.01
		Ly6C low monocytes per ul
		Treatments	WT BM --> WT					TLR7 BM --> WT					TLR7 BM --> TLR7							TLR7 BM --> TLR7
		0	4.93	4.04	3.2		3.95	3.08	3.66	4.97	4.54	4.74	3.08	3.66	4.97	4.54	4.74	3.42	3.59	2.84	4.08	3.67
		2	8.85	10.5	9.92		7.72	5.3	2.97	5.94	2.64	6.76	2.42	2.53	3.92	3.26	2.25	6.46	8.53	6.59	8.68	5.66
		4	47	36.7	30.2		34.5	14.6	11.5	9.91	8.8	12.7	6.82	11.4	8.44	11.8		33.6	27.2	29	31.5	56.9
		Figure 3-figure supplement 1 B
		Monocytes per ul
		Treatments	Δdbl GATA					BALB.c
		0	319.559	577.868	506.432	402.707	385.3		539.703	674.803	620.879	613.497
		1	339.973	240.22	501.973	296.01	148.875	377.066	1127.18	846.207	616.598
		6	2997.61	5333.05	2403.56	3738.17		2355.69	6703.94	5388.69	3439.04	6109.29
		Ly6C high monocytes per ul
		Treatments	Δdbl GATA					BALB.c
		0	225.289	369.836	297.501	241.886	248.189		341.62	453.815	365.629	363.613
		1	206.65	74.6751	310.014	115.374	91.7237	158.669	595.601	326.868	403.396
		6	135.774	175.154	328.82	175.486		203.207	808.673	835.766	254.883	593.474
		Ly6C low monocytes per ul
		Treatments	Δdbl GATA					BALB.c
		0	90.2753	201.869	206.661	156.899	134.508		192.341	217.042	253.871	243.477
		1	127.546	165.095	189.08	178.888	56.7981	213.57	525.867	511.872	207.833
		6	2865.36	5163.12	2064.16	3551.26		2160.01	5898.76	4542.53	3176.66	5498.36
		Ly6C low : Ly6C high ratio
		Treatments	Δdbl GATA					BALB.c
		0	0.400709	0.545833	0.694656	0.648649	0.541958	0.563025	0.478261	0.69434	0.669604
		6	21.1039	29.4776	6.2775	20.2367	10.6296	7.29437	5.43517	12.4632	9.26471
		Figure 3-figure supplement 1C
		Monocytes per ul
		Treatments	WT				Cpa3 Cre/+
		1	56.3816	131.133	99.9581	40.1979	23.9146	16.4977	15.7439	50.6884
		2	2466.62	889.342	2566.12	1113.16	485.627	1367.16	1231.5	1185.29
		3	4700.16	1364.6	2659.74	2086.67	908.527	1441.82	1614.73	846.097
		4	4561.44	2042.32	4127.67	1679.85	1741.8	2127.39	3830.29	1694.31
		Ly6C high monocytes per ul
		Treatments	WT				Cpa3 Cre/+
		1	24.2388	91.2686	61.4926	24.6967	13.6655	10.2129	7.34717	17.9521
		2	978.824	473.759	1467.73	578.227	239.147	724.619	728.344	556.878
		3	290.955	453.215	193.552	446.314	122.418	125.76	179.125	84.2984
		4	132.427	275.155	91.477	109.226	151.121	137.503	91.4462	68.2305
		Ly6C low monocytes per ul
		Treatments	WT				Cpa3 Cre/+
		1	1.84426	26.4889	24.3354	6.56828	5.51875	1.30934	2.62399	4.22403
		2	1496.41	417.931	1107.53	532.062	236.789	645.151	503.678	630.502
		3	4403.47	910.34	2459.5	1611.59	784.266	1315.8	1431.96	750.385
		4	4425.37	1762.19	4032.29	1567.23	1584.42	1985.2	3734.4	1625.03
		Ly6C low : Ly6C high ratio
		Treatments	WT				Cpa3 Cre/+
		4	33.4483	6.39259	44.009	14.3538	10.4839	14.4427	40.795	23.7965
		Figure 3-figure supplement 1D
		Monocytes per ul
		Treatments	anti-FITC+ R848					anti-Ly6G+ R848					anti Ly6G
		0	355.385	222.023	183.118	351.067	289.685	268.672	176.999	634.976	462.139	244.113	527.397	421.632	195.182	549.921	458.551
		1	2.26215	9.95344	0	2.82958	2.36314	4.22766	4.88953	3.19952	7.15313	2.08307	210.356	316.622	54.7083	217.926
		4	1583.67	3429.17	2411.03	1985.1	2335.28	6993.57	12152	3309.17	28257.3		349.317	223.34	286.424	211.925
		Ly6C high monocytes per ul
		Treatments	anti-FITC+ R848					anti-Ly6G+ R848					anti Ly6G
		0	246.57	147.702	109.871	235.29	179.382	175.558	125.883	486.129	317.816	166.48	383.561	324.466	157.376	434.224	314.226
		1	0	0	0	1.41479	1.18157	1.07764	2.40333	6.46859	3.57656	0	52.589	91.9712	17.4968	60.4715
		4	437.422	416.153	434.958	370.813	646.973	758.436	1080.63	427.332	3268.26		120.976	59.8861	93.2348	115.234	54.2988
		Ly6C low monocytes per ul
		Treatments	anti-FITC+ R848					anti-Ly6G+ R848					anti Ly6G
		0	106.5	74.3213	70.5675	112.043	108.075	91.1738	50.3532	148.847	139.716	74.1826	135.118	93.696	36.9263	111.413	138.844
		1	2.26215	3.31781	0	1.41479	1.18157	2.07238	2.40333	0	3.57656	2.08307	163.402	226.159	38.6901	159.736
		4	1114.03	2963.9	1924.65	1572.47	1653.78	6163.29	10987.1	2851.61	24707.8		228.341	163.454	192.349	95.3664	89.1472
		Ly6C low : Ly6C high ratio
		Treatments	anti-FITC+ R848					anti-Ly6G+ R848					anti Ly6G
		0	0.431925	0.503185	0.642276	0.47619	0.602484	0.519337	0.4	0.306189	0.439614		0.352273	0.28877	0.234637	0.256579	0.44186
		4	2.54682	7.12215	4.42492	4.2406	2.55618	8.12632	10.1673	6.67304	7.55994		1.8875	2.72941	2.06306	0.827586	1.64179
