# Supplementary material for: TLR7 activation at epithelial barriers promotes emergency myelopoiesis and lung antiviral immunity
Source: eLife. 2023 Aug 11;12:e85647. doi: 10.7554/eLife.85647 (PMC10465127; doi:10.7554/eLife.85647)
Supplement: Figure 4—source data 1. [file elife-85647-fig4-data1.xlsx]

## Sheet: Figure 4
	Figure 4A
	Monocytes per µl														Ly6C-high monocytes per µl
	Treatments	acetone - spleen				R848 - spleen					R848 + spleen				Treatments	acetone - spleen				R848 - spleen				R848 + spleen
	0	542.414	484.679	204.536		547.777	501.422	309.569	427.271	308.445	171.714	487.232	142.408		0	220.933	165.833	85.3809		264.312	236.638	96.2616	196.284	92.2325	61	188.15	59.1331
	1	392.11	293.401	453.753		20.3282	16.5689	8.92156	11.569	35.6778	15.8079	6.51382	1.56489		1	206.511	127.691	256.9		11.2066	7.10094	6.03517	2.89224	27.0839	6.8501	4.16884	1.30407
	2	173.438	183.963	236.593		864.891	1494.22	1372.66	1054.36	680.157	622.36	754.571	922.946		2	77.2382	76.805	95.4277		464.207	736.519	861.875	529.598	383.187	382.417	509.014	612.062
	3	321.232	263.502	219.375		1543.34	2819.57	1127.07	1787.53	1388.35	826.975	1114.25	1039.36		3	169.91	140.255	139.888		254.477	450.483	215.65	405.041	197.849	161.982	184.617	169.863
	4	266.748	328.318	191.167		2466.13	2472.46	837.114	4404.95	1291.61	1301.7	1817.18	1154.74		4	111.145	132.611	61.5863		155.425	126.074	85.7176	236.391	107.485	95.0196	126.253	131.425
	6	393.811	728.675	518.673		3661.77	8507.77	4036.31	2704.24	2428.43	1285.09	2734.47	3045.33		6	225.26	287.826	304.461		120.838	202.485	96.8715	53.2735	132.835	165.777	155.865	154.398
	Ly6C-low monocytes per µl														Monocyte subpopulation ratio
	Treatments	acetone - spleen				R848 - spleen					R848 + spleen				Treatments	acetone - spleen				R848 - spleen				R848 + spleen
	0	277.457	299.208	114.562		282.097	255.766	211.393	204.418	195.139	99.696	298.81	82.7322		0	1.25584	1.80428	1.34177		1.06729	1.08083	2.19602	1.04144	2.11573	1.63436	1.58815	1.39908
	1	184.815	163.875	193.458		7.03669	2.89297	0.524798	0.525862	4.94802	1.84426	0	0.260815		6	0.71503	1.47089	0.65417		29.1818	40.9244	40.625	49.6954	17.2029	6.68993	16.4386	18.5207
	2	95.6416	106.894	140.601		400.141	756.569	510.502	524.476	296.97	233.019	242.617	270.979
	3	150.013	123.247	77.6573		1288.08	2365.95	911.161	1376.46	1189.19	659.48	923.611	866.089
	4	154.897	190.717	117.833		2308.56	2340	750.667	4155.09	1173.05	1196.68	1675.1	980.469
	6	161.069	423.36	199.171		3526.28	8286.57	3935.41	2647.45	2285.16	1109.03	2562.2	2859.57
	Figure 4B																					Figure 4C
	Monocytes per µl										Monocyte subpopulation ratio												EYFP+ monocytes per µl
	Treatments	No R848				R848					Treatments	No R848				R848						Treatments	No R848				R848
	0	937	860	1224	582	969	684	703	945		0	0	0	0	0	0	0	0	0			0	0.35	0.15	0.28	0.19	0.13	0.09	0.29	0.17
	4	929	737	821	640	3119	2382	2199	2216		4	2	2	2	1	17	15	7	31			4	20	26	17	12	73	150	75	106
	Figure 4E										Figure 4G												EYFP+ monocyte subpopulation ratio
		Percentage cells BRDU+										Percentage cells Sca-1+										Treatments	No R848				R848
	Cell type	Naïve			R848						Cell type	Naïve				R848						4	2	2	2	1	17	15	7	31
	HSPC	3.51	4.38	6.15	50.7	50.8	48.6	38.5	38.6		Monocytes	0.35	0.35	0.17	0.24	31.7	49.4	27	34.8	18.3
	MDP	39.5	39.3	38.9	58.4	53.5	51.4	50.2	56.6		Ly6C-high monocytes	0.26	0.2	0.092	0.1	27.2	41.9	23.4	31.3	15.5
	cMoP	37.5	39.6	43.3	62.6	70.7	70.7	68.3	65.6		Ly6C-low monocytes	0.65	0.78	0.47	0.99	34.9	47.7	34.9	36.5	23.5
	GMP	31.1	35.3	40.9	46.8	42.9	37.3	39.6	36.6
	Monocytes	20.3	21.5	31.7	52.6	53.2	56.3	43.3	53.4
	Ly6C-high monocytes	31.1	32.4	43.1	60	61.2	65.4	53.2	66.6
	Ly6C-low monocytes	2.17	3	3.95	39.4	33.6	30.6	35	21.7
	Figure 4H
		Cells per µl
	Days post R848 treatment	Ly6C-high monocytes			Ly6C-low monocytes			Lymphocytes
	Pre- treatment	92.3145	143.193	124.118	59.4916	107.012	107.25	4769.01	6196.12	7231.27
	1	206.987	303.123	165.817	1716.88	3496.98	1551.5	1067.34	1511.41	1496.29
	4	583.744	226.113	230.353	3805.97	3885.59	918.108	2366.96	1493.48	1196.7
	10	177.19	663.703	328.587	2852.09	2590.94	1689.29	3202.72	3950.42	3274.59
	17	282.163	471.161	536.638	587.796	735.975	799.551	1404.03	3765.6	4314.17
	24	797.248	422.592	372.614	543.938	201.517	217.832	2841.1	3266.37	3396.35
	38	206.907	447.904	347.575	240.182	649.31	384.056	5131.47	7488.04	12797.2
	52	205.165	434.237	221.542	173.31	214.352	139.949	4251.6	6779	4622.37

## Sheet: Figure 4- figure supplement 1
		Figure 4- figure supplement 1B
		EYFP (% of total HSC)
		No R848	R848
		49.3	43.1
		49.8	38.3
		42.8	43.9
		42.3	55.2
