# Supplementary material for: TLR7 activation at epithelial barriers promotes emergency myelopoiesis and lung antiviral immunity
Source: eLife. 2023 Aug 11;12:e85647. doi: 10.7554/eLife.85647 (PMC10465127; doi:10.7554/eLife.85647)
Supplement: Figure 5—source data 1. [file elife-85647-fig5-data1.xlsx]

## Sheet: Figure 5
	Figure 5A								Figure 5B														Figure 5C
	Treatment	Monocytes per µl								Monocytes per µl													CD68+ cells per field
	Isotype	644.188	534.031	1070.25					Treatments	anti-GR1				anti-GR1 + R848				Isotype + R848					Liver		Lung		Kidneys
	anti-GR1	2400.71	1402.25	1470.81					0	841.608	697.722	724.712	381.766	1166.39	1462.71	873.944	537.561	1322.75	570.952	644.98	656.845		Acetone	R848	Acetone	R848	Acetone	R848
									7	946.939	1823.82	327.927	665.992	255.605	362.805	770.673	288.761	6157.35	5095.31	3497.04	8320.02		100	226.8	135.25	141	56	372
	Treatment	Ly6C-high monocytes per µl							8	446.991	548.396	554.407	386.522	783.379	2246.46	336.237	1208.28	3423.33	3634.4	7025.39	5011.48		93.4	233.8	111	284.25	107	302
	Isotype	1215.1	521.156	492.642					9		379.013	685.334	1035.67	482.199	548.136	1147.67	1533.37	5931.4	7935.44	11071.5	12110.4		91	185.2	91.75	204.5	68	252
	anti-GR1	4.89256	6.42444	9.26989																				161.8		268.5	109	140
										Ly6C-high monocytes per µl
	Treatment	Ly6C-low monocytes per µl							Treatments	anti-GR1				anti-GR1 + R848				Isotype + R848
	Isotype	1080.32	822.976	949.714					0	425.985	382.812	377.385	155.072	486.338	694.789	361.134	184.754	617.283	314.437	334.723	365.043
	anti-GR1	615.648	509.94	1036.54					7	38.5019	180.862	6.59069	29.2876	2.30166	13.954	32.771	7.49166	1901.16	1279.37	841.708	1120.21
									8	14.087	16.03	23.3832	21.4457	39.1689	32.9728	9.6863	34.0746	611.984	609.641	1360.77	784.515
									9		20.9536	30.4593	47.5006	26.8223	13.5363	49.2446	51.5024	957.999	2240.24	1797.32	1898.22
										Ly6C-low monocytes per µl
									Treatments	anti-GR1				anti-GR1 + R848				Isotype + R848
									0	353.452	266.689	296.119	184.641	597.619	606.755	459.362	322.536	579.917	194.914	265.776	227.861
									3	884.503	1497.05	305.422	609.824	239.251	326.236	679.026	263.63	3939.33	3305.67	2083.34	6732.14
									3+1	433.446	525.898	520.464	364.079	733.641	2194.08	323.99	1163.24	2761.92	2965.45	5474.74	4120.18
									4		354.362	645.02	973.372	424.938	498.001	1001.38	1348.43	4536.35	4928.54	8224.55	9255.66
