# Supplementary material for: TLR7 activation at epithelial barriers promotes emergency myelopoiesis and lung antiviral immunity
Source: eLife. 2023 Aug 11;12:e85647. doi: 10.7554/eLife.85647 (PMC10465127; doi:10.7554/eLife.85647)
Supplement: Figure 6—source data 1. [file elife-85647-fig6-data1.xlsx]

## Sheet: Figure 6
			Figures 6A																		Figure 6 C
			Monocytes per µl															Lung					Kidney
			Treatments	WT						Ccr22 RFP/RFP								Ccr22 RFP/RFP R848	Ccr22 RFP/RFP naïve	WT R848	WT Naive	Ccr22 RFP/RFP R848	Ccr22 RFP/RFP naïve	WT R848	WT Naive
			0	954.539	1018.58	1597.88	818.054			259.983	299.621	215.372	245.6	230.989	151.356			597	180	339	132	410	70	233	109
			1	156.862	50.4343	228.058	9.35735			46.4437	5.59434	111.991	53.0631	163.696	67.2561			420	149	473	115	223	45	172	43
			4	6688.88	5917.45	6927.95	15111.7			6518.55	6625.42	5909.43	5722.69	5938.13	3819.16			612	237	362	87	159	35	160	37
			6	5804.45	6719.97	4728.53	3427.1			3062.45	5225.93	4607.62	3234.85	4314.93	4641.65			422	175	424	112	228		403	55
			Ly6C-high monocytes per µl
			Treatments	WT						Ccr22 RFP/RFP
			0	475.768	703.522	1140.03	450.035			86.2775	100.338	61.3809	99.203	82.9461	45.2963
			1	103.654	38.8764	148.679	7.60285			21.399	0	77.8316	35.5442	123.033	53.4386
			2	780.83	1168.32	802.318	1559.11			359.835	395.001	285.326	364.732	173.969	420.805
			4	1217.95	838.346	676.938	95.9075			120.386	351.597	166.089	66.1267	124.653	414.552
			Ly6C-low monocytes per µl
			Treatments	WT						Ccr22 RFP/RFP
			0	474.268	309.414	424.053	365.916			148.397	163.049	137.838	142.544	145.943	104.955
			1	42.9174	4.20286	59.8496	0			20.2894	0	31.565	16.405	32.3222	9.82205
			2	5569.46	4615.11	6023.75	12916.9			6020.32	6183.73	5478.27	5260.35	5497.41	3320.57
			4	3785.51	5333.73	3947.87	3209.71			2668.2	4313.31	4361.17	3154.42	4180.68	4013.21
			Figure 6B
			Fold change vs day 0
			Ly6Chigh WT	Ly6Chigh CCR2RFP/RFP	Ly6Clow WT	Ly6Clow CCR2RFP/RFP
			2.18404	1.74581	10.6218	17.9847
			1.50333	5.09879	14.9659	29.0734
			1.21389	2.40858	11.0773	29.396
			0.171983	0.958955	9.00611	21.2621
				1.8077		28.1795
				6.01174		27.0506

## Sheet: Figure 6-figure supplement 1
	Figure 6-figure supplement 1 A											Figure 6-figure supplement 1B				Figure 6-figure supplement 1C
	Monocytes per ul											ug Evans blue per ear				ug Evans blue per tibia
	Treatments	WT				Cx3cr1 GFP/GFP						Naive	R848 Treated	R848 Contralateral		Naive	R848 Treated
	0	829.806	790.059	670.811		465.137	493.287	422.227				0.774801	0.788317	0.79102		1.20179	1.06252
	2	155.933	300.338	1175.66		765.806	1239.1	663.19				0.747788	0.329628	1.24833		0.710009	0.279152
	4	4975.98	3233.26	2600		3596	3621.06	3000.77				0.508441	0.685747	0.342928		1.94425	0.831605
												1.0707	0.318992	0.292425		0.861399	0.404204
	Ly6C high monocytes per ul											0.478999	0.570104	0.109945		0.929213	0.934644
	Treatments	WT				Cx3cr1 GFP/GFP							0.672277	0.444246			0.218195
	0	366.453	362.954	337.281		288.074	262.088	266.029
	2	60.1902	128.244	538.452		107.213	250.299	163.145
	4	341.244	225.569	178.537		305.942	406.368	347.27
	Ly6C low monocytes per ul
	Treatments	WT				Cx3cr1 GFP/GFP
	0	524.268	646.038	381.149		234.747	365.51	208.176
	2	92.9361	166.087	620.749		652.466	976.412	494.076
	4	4337.14	3168.87	2380.49		3171.44	3588.91	2692.11
			Fold change vs day 0
		Ly6Chigh WT	Ly6Chigh CX3CR1GFP/GFP	Ly6Clow WT	Ly6Clow CX3CR1GFP/GFP
		0.93121	1.06202	8.27275	13.51
		0.621481	1.5505	4.90508	9.81893
		0.529343	1.30538	6.24558	12.9319
