# Supplementary material for: TLR7 activation at epithelial barriers promotes emergency myelopoiesis and lung antiviral immunity
Source: eLife. 2023 Aug 11;12:e85647. doi: 10.7554/eLife.85647 (PMC10465127; doi:10.7554/eLife.85647)
Supplement: Figure 7—source data 1. [file elife-85647-fig7-data1.xlsx]

## Sheet: Figure 7
		Figure 7 A
		% of Ly6C-high Sca1+		% of Ly6C-low Sca1+
		WT naïve	WT R848	WT naïve	WT R848
		0.45	22.4	2.05	13.4
		0.4	42.7	9.4	22.9
		1.04	39.4	0.97	20.7
		0.51	52.3	7.91	32.4
		Figure 7B
			Ly6C-high naive				Ly6C-high R848				Ly6C-low naive				Ly6C-low R848
		CCR2	1.0099	1.0138	1.0704	0.905897	0.756727	0.615084	0.986756	0.981179	1.01441	0.98746	1.08553	0.912596	0	0	0.561482
		F4/80	0.971973	1.07157	1.1874	0.769057	0.444977	0.421011	0.630318	0.544837	0.625445	1.10585	1.77237	0.496332	0.202054	0.211696	0.324041
		CD115	1.03042	0.991231	0.936987	1.04136	1.22999	1.14165	1.29279	1.2974	0.937517	0.96748	0.921285	1.17372	2.33124	2.17676	2.41697
		CD62L	1.09373	0.984729	0.997367	0.924171	1.05213	1.17799	1.01053	1.03581	0.898819	0.954768	0.993279	1.15313	1.297	1.23161	1.42925
		CD11c	1.05717	0.884838	0.96106	1.09693	0.884838	0.921292	0.921292	0.96106	1.16394	0.961619	1.01755	0.856888	1.1568	1.12229	1.12229
		CD11a	1.0085	0.981828	0.94331	1.06637	0.884529	0.937935	0.937935	0.932606	0.992711	1.00308	0.938692	1.06551	1.09255	1.09255	1.09255
		CXCR4	1.13663	1.04366	0.854361	0.965344	0.887865	0.994241	0.99131	0.793215	0.972685	0.986431	0.960597	1.08029	1.43272	1.30853	1.29834
		CD43	0.957512	0.977108	0.911253	1.15413	1.01615	1.09119	1.11581	1.0705	0.956616	1.00222	0.986761	1.05441	1.36213	1.29034	1.34041
		Figure 7D
		R848 + X31							Naive + X31
		93	89.8477	87.6652	90.4306	89.3023	86.1905	94.2584	91.3462	93.0108	91.8782	91.8269	91.0448	91.6667	95.5801	95.9391
		100	100	100	100	100	100	100	100	100	100	100	100	100	100	100
		95.5	95.4315	94.2731	93.3014	93.9535	96.6667	92.3445	98.5577	94.6237	93.9086	95.1923	95.5224	94.7917	97.7901	91.8782
		90.5	94.4162	89.4273	88.9952	91.1628	94.7619	88.0383	92.3077	89.2473	91.8782	96.6346	93.5323	94.2708	94.4751	91.8782
		91.5	93.401	88.1057	90.9091	90.6977	95.7143	91.866	96.1538	87.0968	86.2944	89.4231	89.5522	89.0625	91.7127	87.8173
		91.5	92.3858	88.1057	89.9522	90.6977	95.7143	90.9091	87.5	82.2581	79.1878	83.6538	82.5871	81.25	86.1878	84.7716
		93	98.9848	89.8678	97.1292	89.3023	97.619	97.1292	93.75	82.7957	75.6345	81.25	87.0647	78.125	92.2652	88.8325
		X31 M gene rel. to Gapdh (10-3)
			R848 +X31	Naïve+ X31
			0.621768	1.47228
			0.862208	1.97398
			1.84597	4.90175
			6.49692	15.5482
			1.72526	4.08165
			0.706131	3.39131
			0.703621	5.00372
			4.26658	4.48649
			Figure 7E
			RSV L gene copies
			RSV	R848+RSV
			25800	286
			25200	4240
			22700	0
			27100	0
			0	4320
			13500	1140
			5430	1180
			34000	4940

## Sheet: Figure 7-figure supplement 1
		Figure 7- figure supplement 1A
		Mean GFP+ cells/min
		Acetone	R848
		1.87322	17.9915
		2.09408	27.2782
		6.21972	21.3541
			23.2311
			36.6931
		Figure 7- figure supplement 1B
		IL6 pg/ml
		Naive BM/ Naive	Naive BM/ R848	Naive BM/ LPS	R848 BM/ Naive	R848 BM/ R848	R848 BM/ LPS
		0	209.62	2156.57	0	154.665	2431.03
		0	313.13	1945.61	0	101.355	3831.65
		0	299.645	2346.92	0	102.465	3373.14
		0	195.86	1914.88	0	130.71	3961.28
		TNF-a pg/ml
		Naive BM/ Naive	Naive BM/ R848	Naive BM/ LPS	R848 BM/ Naive	R848 BM/ R848	R848 BM/ LPS
		0	421.775	658.095	0	334.11	674.465
		0	609.975	653.68	0	267.19	806.52
		0	533.095	719.275	0	267.635	731.56
		0	413.785	609.58	0	273.625	911.12
		IL-12p40 pg/ml
		Naive BM/ Naive	Naive BM/ R848	Naive BM/ LPS	R848 BM/ Naive	R848 BM/ R848	R848 BM/ LPS
		0	108.595	29.365	0	129.08	25.095
		0	175.52	23.35	0	98.295	15.65
		0	160.95	28.46	0	102.185	16.42
		0	124.47	20.395	0	115.615	18.13
		IL 1beta pg/ml
		Naive BM/ Naive	Naive BM/ R848	Naive BM/ LPS	R848 BM/ Naive	R848 BM/ R848	R848 BM/ LPS
		0	8.46	18.91	0	3	18.705
		0	11.795	18.78	0	1.855	13.15
		0	9.53	23.075	0	1.475	14.32
		0	6.32	17.76	0	3.305	18.365
